# Supplementary material
Source: Royal Society of Chemistry journal article supplement (doi:10.1039/d6ja00111d)
Supplement: d6ja00111d1.pdf [file d6ja00111d1.pdf]

# Supporting Information

## High-precision determination of Indium isotope by MC-ICP-MS with a two-stage column separation method with extraction resin

Bingyu Peng<sup>1,2</sup>, Qiaohui Zhong<sup>1,2</sup>, Gaobin Chu<sup>3</sup>, Jie Li<sup>1,\*</sup>

*1. State Key Laboratory of Deep Earth Processes and Resources, Guangzhou Institute of Geochemistry, Chinese Academy of Sciences, Guangzhou 510640, China; 2. College of Earth and Planetary Sciences, University of Chinese Academy of Sciences, Beijing 100049, China; 3. Guangzhou Tuoyan Analytical Technology Co., Ltd., Guangzhou 510640, China.*

### Table of Contents

**Table S1** GRMs investigated in this study.

**Table S2** The Separation Processes for In in this study and other purification method for comparison.

**Table S3** Ratios of some element X relative to In mass fractions after separation of nine geological reference materials.

**Table S4** In isotopic compositions of geological reference materials from this study and the literature.

**Table S1** GRMs investigated in this study.

| GRM          | Supplier <sup>a</sup> | Lithology           | Reported In mass fraction (μg/g)       | Reported $\delta^{115/113}\text{In}_{\text{IPGP}}$ (‰) |
|--------------|-----------------------|---------------------|----------------------------------------|--------------------------------------------------------|
| GSP-2        | (USGS)                | Granodiorite        | 0.035 <sup>b</sup> -0.069 <sup>c</sup> | 0.39 <sup>c</sup>                                      |
| BIR-1a       | (USGS)                | Basalt              | 0.016 <sup>d</sup> -0.076 <sup>c</sup> | 0.36-0.41 <sup>c</sup>                                 |
| BHVO-2       | (USGS)                | Basalt              | 0.023 <sup>e</sup> -1.87 <sup>d</sup>  | 0.30-0.34 <sup>c</sup>                                 |
| GBW07105     | (IGGE)                | Olivine basalt      | 0.06 <sup>f</sup> -0.064 <sup>g</sup>  |                                                        |
| GBW07405a    | (IGGE)                | Soil                | 0.122 <sup>h</sup>                     |                                                        |
| GBW07406a    | (IGGE)                | Soil                |                                        |                                                        |
| GBW07315     | (NRCG)                | Marine sediment     |                                        |                                                        |
| GBW07295     | (NRCG)                | polymetallic nodule | 120 <sup>i</sup>                       |                                                        |
| GBW(E)070026 | (IGGE)                | Sulfide             |                                        |                                                        |

<sup>a</sup> Source of the reference material. USGS, United States Geological Survey; IGGE, Institute of China Geophysical and Geochemical Exploration; NRCG, National Research Center of Geoanalysis, China.

The GeoReM database (<http://georem.mpch-mainz.gwdg.de>, last checked on 01.22.2026) proposes working values for the GRMs above.

The In mass fraction of GRMs from the literature: <sup>b</sup> Simons et al., (2017)<sup>21</sup>; <sup>c</sup> Liu et al., (2023)<sup>17</sup>; <sup>d</sup> Zou et al., (2020)<sup>22</sup>; <sup>e</sup>

**Table S2** The Separation Processes for In in this study and other purification method for comparison.

| Method                          | Stage                                 | Resin                                      | Step                                     | Purpose        | Volume (mL) |
|---------------------------------|---------------------------------------|--------------------------------------------|------------------------------------------|----------------|-------------|
| This study                      | First                                 | N235 resin<br>(0.6-0.8 mL, 75 $\mu$ m)     | 2 mol/L HNO <sub>3</sub>                 | Clean          | 4           |
|                                 |                                       |                                            | 0.5 mol/L HBr                            | Condition      | 4           |
|                                 |                                       |                                            | 0.5 mol/L HBr                            | Load           | 6-8         |
|                                 |                                       |                                            | 0.5 mol/L HBr                            | Matrix removal | 14          |
|                                 |                                       |                                            | 0.2 mol/L HCl                            | Collect        | 12          |
|                                 | Second                                | TOPO resin<br>(0.4-0.5 mL, 50-100 $\mu$ m) | 2 mol/L HNO <sub>3</sub>                 | Clean          | 6           |
|                                 |                                       |                                            | 0.5 mol/L HCl                            | Condition      | 3           |
|                                 |                                       |                                            | 0.5 mol/L HCl                            | Load           | 13          |
|                                 |                                       |                                            | 0.5 mol/L HCl                            | Matrix removal | 10          |
|                                 |                                       |                                            | 1 mol/L HCl + 0.8 mol/L HNO <sub>3</sub> | Collect In     | 6           |
| Liu <i>et al.</i> <sup>17</sup> | First                                 | AG1-X8<br>(0.4 mL, 100-200 mesh)           | 1.5 mol/L HBr                            | Condition      | 3           |
|                                 |                                       |                                            | 1.5 mol/L HBr                            | Load           | 3           |
|                                 |                                       |                                            | 0.1 mol/L HBr                            | Collect        | 12          |
|                                 | Second                                | AG1-X8<br>(0.4 mL, 100-200 mesh)           | 1.5 mol/L HBr                            | Condition      | 3           |
|                                 |                                       |                                            | 1.5 mol/L HBr                            | Load           | 0.5         |
|                                 |                                       |                                            | 1.5 mol/L HBr                            | Matrix removal | 2.5         |
|                                 |                                       |                                            | 0.1 mol/L HBr                            | Load           | 12          |
|                                 | Third                                 | AG1-X8<br>(0.4 mL, 100-200 mesh)           | 2 mol/L HCl                              | Condition      | 3           |
|                                 |                                       |                                            | 2 mol/L HCl                              | Load           | 1           |
|                                 |                                       |                                            | 2 mol/L HCl                              | Collect        | 9           |
|                                 | Fourth                                | AG1-X8<br>(0.4 mL, 100-200 mesh)           | 0.1 mol/L HF                             | Condition      | 3           |
|                                 |                                       |                                            | 0.1 mol/L HF                             | Load           | 1           |
|                                 |                                       |                                            | 0.1 mol/L HF                             | Collect        | 9           |
| Zhu <i>et al.</i> <sup>18</sup> | Single column<br>(3 mL, 100-200 mesh) | 7 mol/L HCl                                | Condition                                | 10             |             |
|                                 |                                       | 7 mol/L HCl                                | Load                                     | 3              |             |
|                                 |                                       | 7 mol/L HCl                                | Matrix removal                           | 10             |             |
|                                 |                                       | 6 mol/L HCl                                | Collect                                  | 16             |             |

**Table S3** Ratios of some element X relative to In mass fractions after separation of nine geological reference materials.

[X]/[In] (con./con.)

| Sample    | Mg      | Ca      | Fe      | Zn       | Ge      | As      | Mo      | Ru      | Cd      | Sn      | Sb      |
|-----------|---------|---------|---------|----------|---------|---------|---------|---------|---------|---------|---------|
| GSP-2     | 0.00000 | 0.00000 | 0.00000 | 1.93639  | 0.00000 | 0.00576 | 0.00000 | 0.00000 | 0.00051 | 0.00580 | 0.00097 |
| BIR-1     | 0.00000 | 0.00000 | 3.99100 | 4.10956  | 0.00000 | 0.00000 | 0.00280 | 0.00000 | 0.00027 | 0.00596 | 0.30496 |
| BHVO-2    | 0.42137 | 0.00000 | 0.00000 | 0.00000  | 0.00000 | 0.00000 | 0.00003 | 0.00000 | 0.00000 | 0.00000 | 0.00000 |
| GBW07105  | 0.42246 | 0.00000 | 0.00000 | 0.06316  | 0.00000 | 0.00000 | 0.00000 | 0.00000 | 0.00000 | 0.00000 | 0.00000 |
| GBW07405a | 0.00000 | 0.00000 | 0.00000 | 0.00000  | 0.00000 | 0.00134 | 0.00173 | 0.00000 | 0.00034 | 0.00372 | 0.20672 |
| GBW07406a | 0.00000 | 0.00000 | 0.13787 | 15.74698 | 0.00000 | 0.00026 | 0.00525 | 0.00000 | 0.00007 | 0.00069 | 0.01084 |
| GBW07315  | 0.05827 | 0.00000 | 0.00000 | 0.00000  | 0.00000 | 0.00000 | 0.00000 | 0.00005 | 0.00000 | 0.00000 | 0.00000 |
| GBW07295  | 0.04365 | 0.00000 | 0.00000 | 0.00000  | 0.00000 | 0.00000 | 0.00000 | 0.00000 | 0.00000 | 0.00000 | 0.00000 |
| GBW07026  | 0.00000 | 0.00000 | 0.00000 | 2.93770  | 0.00000 | 0.00311 | 0.00000 | 0.00000 | 0.00021 | 0.00038 | 0.06437 |

Effectiveness of purification procedures on removing the matrix elements for nine geological reference materials. X denotes a matrix element, and X/In is the concentration ratio of the matrix elements to In. The concentration values of X and In are averaged over the three measurements with a relative standard deviation of <5.00%.

**Table S4** In isotopic compositions of geological reference materials from this study and the literature.

| Reference material     | Lithology              | Oringin                                | In ( $\mu\text{g/g}$ ) <sup>a</sup> | RSD (%)     | $\delta^{115/113}\text{In}_{\text{IPGP}}$ (‰) | 2SD         | N | n |
|------------------------|------------------------|----------------------------------------|-------------------------------------|-------------|-----------------------------------------------|-------------|---|---|
| GSP-2<br>(USGS)        | Granodiorite           | This study                             | 0.042                               | <b>1.36</b> | 0.28                                          | 0.07        | 3 | 3 |
|                        |                        | This study                             | 0.042                               |             | 0.25                                          | 0.07        |   |   |
|                        |                        | This study                             | 0.043                               |             | 0.30                                          | 0.03        |   |   |
|                        |                        | <b>Mean</b>                            | <b>0.042</b>                        |             | <b>0.29</b>                                   | <b>0.02</b> |   |   |
| BIR-1a<br>(USGS)       | Basalt                 | Liu <i>et al.</i> (2023) <sup>17</sup> | 0.069                               | <b>1.33</b> | 0.39                                          | 0.06        | 3 | 3 |
|                        |                        | This study                             | 0.043                               |             | 0.42                                          | 0.08        |   |   |
|                        |                        | This study                             | 0.044                               |             | 0.45                                          | 0.11        |   |   |
|                        |                        | This study                             | 0.043                               |             | 0.45                                          | 0.08        |   |   |
|                        |                        | <b>Mean</b>                            | <b>0.043</b>                        |             | <b>0.44</b>                                   | <b>0.03</b> |   |   |
| BHVO-2<br>(USGS)       | Basalt                 | Liu <i>et al.</i> (2023) <sup>17</sup> | 0.076                               | <b>0.78</b> | 0.39                                          | 0.07        | 3 | 3 |
|                        |                        | This study                             | 0.075                               |             | 0.22                                          | 0.03        |   |   |
|                        |                        | This study                             | 0.074                               |             | 0.28                                          | 0.04        |   |   |
|                        |                        | This study                             | 0.074                               |             | 0.22                                          | 0.04        |   |   |
|                        |                        | <b>Mean</b>                            | <b>0.074</b>                        |             | <b>0.24</b>                                   | <b>0.07</b> |   |   |
| GBW07105<br>(IGGE)     | Olivine<br>basalt      | Liu <i>et al.</i> (2023) <sup>17</sup> | 0.087                               | <b>0.97</b> | 0.32                                          | 0.04        | 3 | 3 |
|                        |                        | This study                             | 0.06                                |             | 0.41                                          | 0.05        |   |   |
|                        |                        | This study                             | 0.059                               |             | 0.36                                          | 0.05        |   |   |
|                        |                        | <b>Mean</b>                            | <b>0.06</b>                         |             | <b>0.37</b>                                   | <b>0.07</b> |   |   |
| GBW07405a<br>(IGGE)    | Soil                   | This study                             | 1.518                               | <b>2.64</b> | 0.14                                          | 0.05        | 3 | 3 |
|                        |                        | This study                             | 1.515                               |             | 0.17                                          | 0.07        |   |   |
|                        |                        | This study                             | 1.587                               |             | 0.15                                          | 0.09        |   |   |
|                        |                        | <b>Mean</b>                            | <b>1.54</b>                         |             | <b>0.16</b>                                   | <b>0.03</b> |   |   |
|                        |                        | Fan <i>et al.</i> (2009) <sup>26</sup> | 0.122                               |             |                                               |             |   |   |
| GBW07406a<br>(IGGE)    | Soil                   | This study                             | 1.617                               | <b>0.69</b> | 0.19                                          | 0.05        | 3 | 3 |
|                        |                        | This study                             | 1.61                                |             | 0.15                                          | 0.03        |   |   |
|                        |                        | This study                             | 1.632                               |             | 0.17                                          | 0.08        |   |   |
|                        |                        | <b>Mean</b>                            | <b>1.619</b>                        |             | <b>0.17</b>                                   | <b>0.04</b> |   |   |
| GBW07315<br>(NRCG)     | Marine<br>sediment     | This study                             | 0.12                                | <b>1.28</b> | 0.17                                          | 0.07        | 3 | 3 |
|                        |                        | This study                             | 0.119                               |             | 0.21                                          | 0.07        |   |   |
|                        |                        | This study                             | 0.117                               |             | 0.23                                          | 0.02        |   |   |
|                        |                        | <b>Mean</b>                            | <b>0.119</b>                        |             | <b>0.20</b>                                   | <b>0.06</b> |   |   |
| GBW07295<br>(NRCG)     | polymetallic<br>nodule | This study                             | 0.338                               | <b>3.27</b> | 0.07                                          | 0.04        | 3 | 3 |
|                        |                        | This study                             | 0.339                               |             | 0.03                                          | 0.04        |   |   |
|                        |                        | This study                             | 0.358                               |             | 0.02                                          | 0.06        |   |   |
|                        |                        | <b>Mean</b>                            | <b>0.345</b>                        |             | <b>0.04</b>                                   | <b>0.05</b> |   |   |
| GBW(E)070026<br>(IGGE) | Sulfide                | This study                             | 45.89                               |             | 0.14                                          | 0.07        | 2 | 3 |
|                        |                        | This study                             | 47.83                               |             | 0.10                                          | 0.01        |   |   |
